# Supplementary material for: Confidence in Care Provision Among Third-Year Midwifery Students in Western Kenya
Source: Research Square preprint supplement (doi:10.21203/rs.3.rs-7123223/v1), 2025-08-19
Supplement: Supplementary file 1 [file 1207d88dff526dc17691b760.docx]

**TAZAMA STUDY**

**CLASSROOM OBSERVATION CHECKLIST- ENGLISH**

**Staff ID: _____________________ Site** (Circle one):KMTC Siaya / KMTC Kisumu

**Guidance for KMTC Classroom Observation**

| **Counties** | **Dimension of observations** | **Definition** |
| --- | --- | --- |
| **Kisumu City**          **Siaya County** | **Curriculum Components** | What emphasis exists on hands-on clinical practice and simulation training? |
| **Teaching Methods** | Use of interactive and experiential learning approaches.  Availability and quality of mentoring and supervision during training.  Opportunities for reflective practice and feedback. |
| **Support Systems** | Access to resources, including textbooks, journals, and online materials.  Peer support and collaborative learning opportunities.  Support from faculty and clinical supervisors. |
| **Training Environment** | Differences in resources and facilities between urban and rural training sites.  Variations in clinical exposure and patient demographics. |
| **Community Engagement** | Opportunities for students to engage with local communities.  Understanding of local health challenges and cultural competencies. |
| **Support and Supervision** | Availability of experienced mentors and supervisors in different settings.  Support networks for students in rural vs. urban locations. |
| **Practical Experience** | Range and complexity of clinical cases encountered.  Opportunities for autonomous practice and decision-making. |
| **Feedback and Reflection** | Mechanisms for receiving and acting on feedback.  Reflection sessions on experiences in different settings. |

**Observation Checklist**

| *Please indicate if you observe the following (Y/N) and provide detailed notes about your observations.* | **Y** | **N** |
| --- | --- | --- |
| 1. **Are there opportunities for hands-on clinical practice and simulation training?** |  |  |
| 1. **Did the tutor use interactive and experiential learning approaches?** |  |  |
| 1. **Was there access to resources, including textbooks, journals, and online materials?** |  |  |
| 1. **Was there quality of mentoring and supervision during training?** |  |  |
| 1. **Are there experienced mentors and supervisors in different settings?** |  |  |
| 1. **Did the tutor provide opportunities for reflective practice and feedback?** |  |  |
| 1. **Is there peer support and collaborative learning opportunities?** |  |  |
| 1. **Is there support from faculty and clinical supervisors?** |  |  |
| 1. **Do the students have autonomous practice and decision-making?** |  |  |
| 1. **Are there different mechanisms for receiving and acting on feedback** |  |  |

**Completed by:** Staff Initials:__ __ __Date__ __/__ __ __/__ __ __ __

**Reviewed by:** Staff Initials:__ __ __Date__ __/__ __ __/__ __ __ __

**TAZAMA STUDY**

**PRACTICUM/CLINICAL OBSERVATION CHECKLIST- ENGLISH**

**Staff ID: _____________________ Site** (Circle one):KMTC Siaya / KMTC Kisumu

**Guidance for KMTC Clinical Observations**

| **Dimension of observations** | **Definition** |
| --- | --- |
| **Infrastructure** | **Availability and quality of maternity wards and labor rooms.**  **Cleanliness, hygiene, and safety standards.**  **Availability of essential equipment and supplies (e.g., delivery beds, sterilization equipment).**  **Availability of medications and emergency care resources.** |
| **Accessibility** | **Geographic location and accessibility (urban vs. rural).**  **Transportation options and ease of access for pregnant women.**  **Waiting times and appointment systems.** |
| **Staffing** | **Number of midwives and other healthcare providers.**  **Staff-to-patient ratios.**  **Training and qualifications of midwives.** |
| **Patient-Centered Care** | **Respect for women’s preferences and autonomy.**  **Communication and information provided to women.**  **Emotional support and comfort measures.** |
| **Clinical Practices** | **Adherence to evidence-based practices and guidelines.**  **Use of pain management techniques.**  **Monitoring and management of labor and delivery.**  **Postnatal care and follow-up.** |

| **Please, let us know if the following study related statements are Yes or No** | **Y** | **N** |
| --- | --- | --- |
| 1. Are there quality maternity wards and labor rooms? |  |  |
| 2. Is there availability of essential delivery equipment and supplies? |  |  |
| 3. Are there opportunities for students to engage with local communities? |  |  |
| 4. Do the students understand local health challenges and cultural competencies? |  |  |
| 5. Are the clinic/hospital hygienic conditions and safety standards maintained? |  |  |
| 6.Does the hospital have readily available medications and emergency care? |  |  |
| 7. Are there opportunities for autonomous practice and decision-making for the students? |  |  |
| 8. Are there enough midwives and other healthcare workers? |  |  |
| 9.Are there different transportation options to ease access for pregnant to the hospital? |  |  |
| 10. Are the students able to confidently monitor and manage labor and delivery? |  |  |

Total Score: __ __/**08** Percentage: __ __ __  **%**

**Completed by:** Staff Initials:__ __ __Date__ __/__ __ __/__ __ __ __

**Reviewed by:** Staff Initials:__ __ __Date__ __/__ __ __/__ __ __ __
