# Supplementary material for: Confidence in Care Provision Among Third-Year Midwifery Students in Western Kenya
Source: Research Square preprint supplement (doi:10.21203/rs.3.rs-7123223/v1), 2025-08-19
Supplement: Supplementary file 2 [file 3a33aea1fcfdf19f57a30c99.docx]

**______________________________________________________________________________**

**Interview Guide: TAZAMA Study Aim 2**

***Instruction to interviewers****:*

***Part A*** *of the IDI guide applies to* ***Student Midwives/Nurses****.*

***Part B*** *applies to* ***Instructors for Theory and Practical.***

***Part C*** *applies to* ***Administrative Staff.***

**AIM 2 Part A: Student Midwife/Nurse**

Thank you for participating in this interview. Your insights are invaluable for understanding the relationship between confidence and competence in midwifery practice. The aim of this interview is to explore your confidence in providing care aligned with your training, particularly focusing on the domains outlined by the International Confederation of Midwives (ICM) Essential Competencies for Midwifery Practice.

Please remember that there are no right or wrong answers to any of the questions I will ask you today. I am simply interested in your experiences. Your participation is voluntary, and you can withdraw at any point during this interview. You may decline to answer any question or stop the interview anytime and for any reason. The interview should take approximately 45 minutes. The questions will focus on your training. With your permission, I would like to record the interview because I don’t want to miss any of the information you choose to share.

All responses will be kept confidential. This means that your interview responses will only be shared with research team members, and we will ensure that any information we include in our report does not identify you as the respondent. Remember, you don’t have to talk about anything you don’t want to, and you may end the interview at any time. The audiotape, notes, and any transcript of this interview will be deidentified and not connected to you. If, at the end of the interview, you realize that you mentioned something you would not like me to share outside our conversation today, please let me know. Do you have any questions before we begin the interview?

Thank you for permitting me to record this interview.

I am turning the recorder on now.

***Section 1: Introduction***

1. Can you please walk me through what went into your decision to become a midwife/nurse?
2. What were the prerequisites for attending the midwifery training you are currently attending?
3. Please describe the structure of your training program here at KMTC.
   1. Probe: What are the different types of midwifery programs that exist at KMTC?
   2. Probe: Duration of the program?
   3. Probe: Discuss the theoretical and classroom components of the program.
      1. Duration?
   4. Probe: Discuss the clinical and practical components of the program.
      1. Duration?
   5. Tell me about where you are in your midwifery training.
      1. What year are you and how long before you graduate?

***Section 2: Practice-based learning***

1. So far, what aspects of your training program do you find most valuable in preparing you as a practicing nurse/midwife?
2. So far in your training, which aspects of your training do you find least valuable in preparing you as a practicing nurse/midwife?

***Section 3: Understanding Confidence in Alignment with Training***

1. Please tell me what your understanding of confidence is.
2. How would you describe your overall confidence level in providing midwifery services?
   1. Can you elaborate on the specific areas where you feel particularly confident or less confident?

***Section 4: Exploring Confidence in ICM Competencies***

In this section, I will focus on your confidence in the four domains of ICM competencies: antenatal, intrapartum, postpartum, and newborn care. I will ask you to rate your confidence in providing care in these areas on a scale from 1 to 10. Following your rating, I will invite you to provide more detailed insights into your confidence level.

1. Are you familiar with the ICM Essential Competencies for Midwifery Practice?
2. Antenatal care
   1. On a scale of 1 to 10, how confident do you feel in your ability to provide care aligned with the antenatal care competencies?
   2. Can you explain your rating?
3. Intrapartum
   1. On a scale of 1 to 10, how confident do you feel in your ability to provide care aligned with the intrapartum care competencies?
   2. Can you explain your rating?
4. Postpartum
   1. On a scale of 1 to 10, how confident do you feel in your ability to provide care aligned with the postpartum care competencies?
   2. Can you explain your rating?
5. Newborn care
   1. On a scale of 1 to 10, how confident do you feel in your ability to provide care aligned with the newborn care competencies?
   2. Can you explain your rating?

***Section 5: Factors Influencing Confidence***

1. Walk me through some experiences during your training that have influenced your confidence positively.
2. Can you describe some experiences during your training that have influenced your confidence negatively?
3. How has your interaction with the teachers and clinical instructors and qualified Nurse/midwives during your training program affected your confidence in providing care?
   1. In what ways do you feel supported by teachers and clinical instructors during your training?

______________________________________________________________________________

**AIM 2 Part B: Instructors (For Theory and Clinical Experience)**

Thank you for participating in this interview. Your insights are invaluable for understanding the relationship between confidence and competence in midwifery practice. The aim of this interview is to explore your confidence in providing care aligned with your training, particularly focusing on the domains outlined by the International Confederation of Midwives (ICM) Essential Competencies for Midwifery Practice.

Please remember that there are no right or wrong answers to any of the questions I will ask you today. I am simply interested in your experiences. Your participation is voluntary, and you can withdraw at any point during this interview. You may decline to answer any question or stop the interview anytime and for any reason. The interview should take approximately 45 minutes. The questions will focus on your training. With your permission, I would like to record the interview because I don’t want to miss any of the information you choose to share.

All responses will be kept confidential. This means that your interview responses will only be shared with research team members, and we will ensure that any information we include in our report does not identify you as the respondent. Remember, you don’t have to talk about anything you don’t want to, and you may end the interview at any time. The audiotape, notes, and any transcript of this interview will be deidentified and not connected to you. If, at the end of the interview, you realize that you mentioned something you would not like me to share outside our conversation today, please let me know. Do you have any questions before we begin the interview?

Thank you for permitting me to record this interview.

I am turning the recorder on now.

***Section 1: Introduction***

1. Can you please walk me through what went into your decision to become an instructor?
   1. What is your nursing/midwifery background?
   2. How long have you been practicing?
2. Please describe the prerequisites for attending this midwifery training program.
3. Can you tell me about the structure of this training program?
4. Probe: What are the different types of midwifery/nursing programs that exist at KMTC?
5. Probe: Duration of program?
6. Probe: Discuss the theoretical and classroom components of the program.
   1. Duration?
7. Probe: Discuss the clinical and practical components of the program.
   1. Duration?
8. How are clinical skills and theoretical knowledge balanced in the curriculum?

***Section 2: Practice-based learning***

1. How do you facilitate the transition of trainee midwives from classroom learning to clinical practice?
2. Can you walk me through the steps you take to ensure that trainee midwives gain exposure to a diverse range of clinical experiences during their training?
3. What are some indicators that a trainee is ready to graduate and begin working in the health system?
4. In your experience as an instructor in this program, what are some barriers to effective in-class education?
   1. Can you provide me with some specific examples?
5. What are some barriers to effective clinical/practical education?
   1. Can you provide me with some specific examples?

***Section 3: Interaction with Students***

1. How do you support trainee midwives' emotional well-being throughout their training?
2. What strategies do you use to mentor and support trainee midwives during their clinical placements?
3. How do you support students when they express fear and anxiety about their ability to perform the clinical skills they learn?

***Section 4: Exploring Confidence in ICM Competencies***

1. Could you provide an overview of how you implement global standards set by ICM in the regulatory documents defining midwives’ training requirements within your program?
2. What ongoing efforts are being made to align midwifery training standards and practices more closely with global standards set by organizations like the ICM?
   1. What challenges or opportunities do you foresee in this process?
3. What aspects of midwifery training do you believe contribute most significantly to midwives’ confidence in delivering care after training?
4. How do you perceive training location, whether urban or rural, impacting midwives' confidence or feeling of preparedness upon completion of their training?
5. Are there specific challenges or advantages associated with training settings (urban or rural) regarding training outcomes?

***Section 5: Trainee Transition***

- 1. Walk me through the process of transitioning from training to working in the workforce.

Probe: What steps are involved in this transition process?

1. What role does KMTC play in the transition of trainee midwives?

Probe: How do you collaborate with health facilities to match graduates with available positions and ensure a smooth transition into practice?

1. From your perspective, what are some opportunities for improvement in the current process of transitioning trainee midwives into the workforce?

How do you think key stakeholders in maternal health can collaborate to support an effective and efficient transition process

______________________________________________________________________________

**AIM 2 Part C: Administrative Staff**

Thank you for participating in this interview. Your insights are invaluable for understanding the relationship between confidence and competence in midwifery practice. The aim of this interview is to explore your confidence in providing care aligned with your training, particularly focusing on the domains outlined by the International Confederation of Midwives (ICM) Essential Competencies for Midwifery Practice.

Please remember that there are no right or wrong answers to any of the questions I will ask you today. I am simply interested in your experiences. Your participation is voluntary, and you can withdraw at any point during this interview. You may decline to answer any question or stop the interview anytime and for any reason. The interview should take approximately 45 minutes. The questions will focus on your training. With your permission, I would like to record the interview because I don’t want to miss any of the information you choose to share.

All responses will be kept confidential. This means that your interview responses will only be shared with research team members, and we will ensure that any information we include in our report does not identify you as the respondent. Remember, you don’t have to talk about anything you don’t want to, and you may end the interview at any time. The audiotape, notes, and any transcript of this interview will be deidentified and not connected to you. If, at the end of the interview, you realize that you mentioned something you would not like me to share outside our conversation today, please let me know. Do you have any questions before we begin the interview?

Thank you for permitting me to record this interview.

I am turning the recorder on now.

***Section 1: Introduction***

1. Can you please walk me through your position in this training program?
   1. How did you begin working here?
2. Please describe the prerequisites for attending this midwifery training program.
3. Can you tell me about the structure of this training program?
   1. Probe: What are the different types of midwifery/nursing programs that exist at KMTC?
   2. Probe: Duration of program?
   3. Probe: Discuss the theoretical and classroom components of the program.
      1. Duration?
   4. Probe: Discuss the clinical and practical components of the program.
      1. Duration?
4. How are clinical skills and theoretical knowledge balanced in the curriculum?

***Section 2: Practice-based learning***

1. How do you facilitate the transition of trainee midwives from classroom learning to clinical practice?
2. Can you what me through the steps you take to ensure that trainee midwives gain exposure to a diverse range of clinical experiences during their training?
3. What are some indicators that a trainee is ready to graduate and begin working in the health system?
4. In your experience as an instructor in this program, what are some barriers to effective in-class education?
5. Can you provide me with some specific examples?
6. What are some barriers to effective clinical/practical education?
7. Can you provide me with some specific examples?

***Section 3: Interaction with Students***

1. How do you support trainee midwives' emotional well-being throughout their training?
2. How do you support students when they express fear and anxiety about their ability to perform the clinical skills they learn?
3. Can you tell me about the instructor to trainee midwives’ ratio?
4. Are the clinical instructors readily available to assist trainee midwives outside classroom hours?
5. How has this ratio impacted your training experience?

***Section 4: Exploring Confidence in ICM Competencies***

1. Can you provide an overview of how you implement global standards set by ICM in the regulatory documents defining midwives’ training requirements within your program?
2. What ongoing efforts are being made to align midwifery training standards and practices more closely with global standards set by organizations like the ICM?
   1. Probe: What challenges or opportunities do you foresee in this process
3. What aspects of midwifery training do you believe contribute most significantly to midwives’ confidence in delivering care after training?
4. How do you perceive training location, whether urban or rural, impacting midwives' confidence or feeling of preparedness upon completion of their training?
5. Are there specific challenges or advantages associated with training settings (urban or rural) in terms of training outcomes?

***Section 5: Trainee Transiti***on

1. Walk me through the process of transitioning from training to working the workforce.
   - 1. Probe: What steps are involved in this transition process?
2. What role do healthcare facilities play in the transition of trainee midwives?
   - 1. Probe: How do you collaborate with these institutions to match graduates with available positions and ensure a smooth transition into practice?
3. From your perspective, what are some opportunities for improvement in the current process of transitioning trainee midwives into the workforce?
4. How do you think key stakeholders in maternal health can collaborate to support an effective and efficient transition process?
